# Supplementary material for: CCL19 enhances CD8+ T-cell responses and accelerates HBV clearance
Source: PubMed Central journal article supplement (PMC8316179; doi:10.1007/s00535-021-01799-8), 2021-07-03

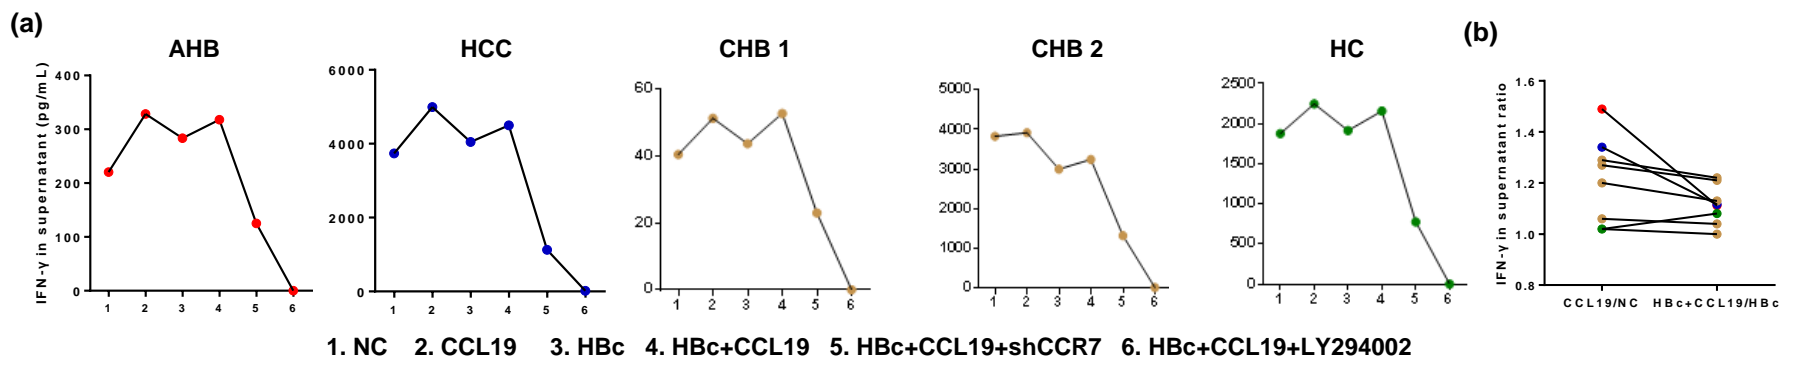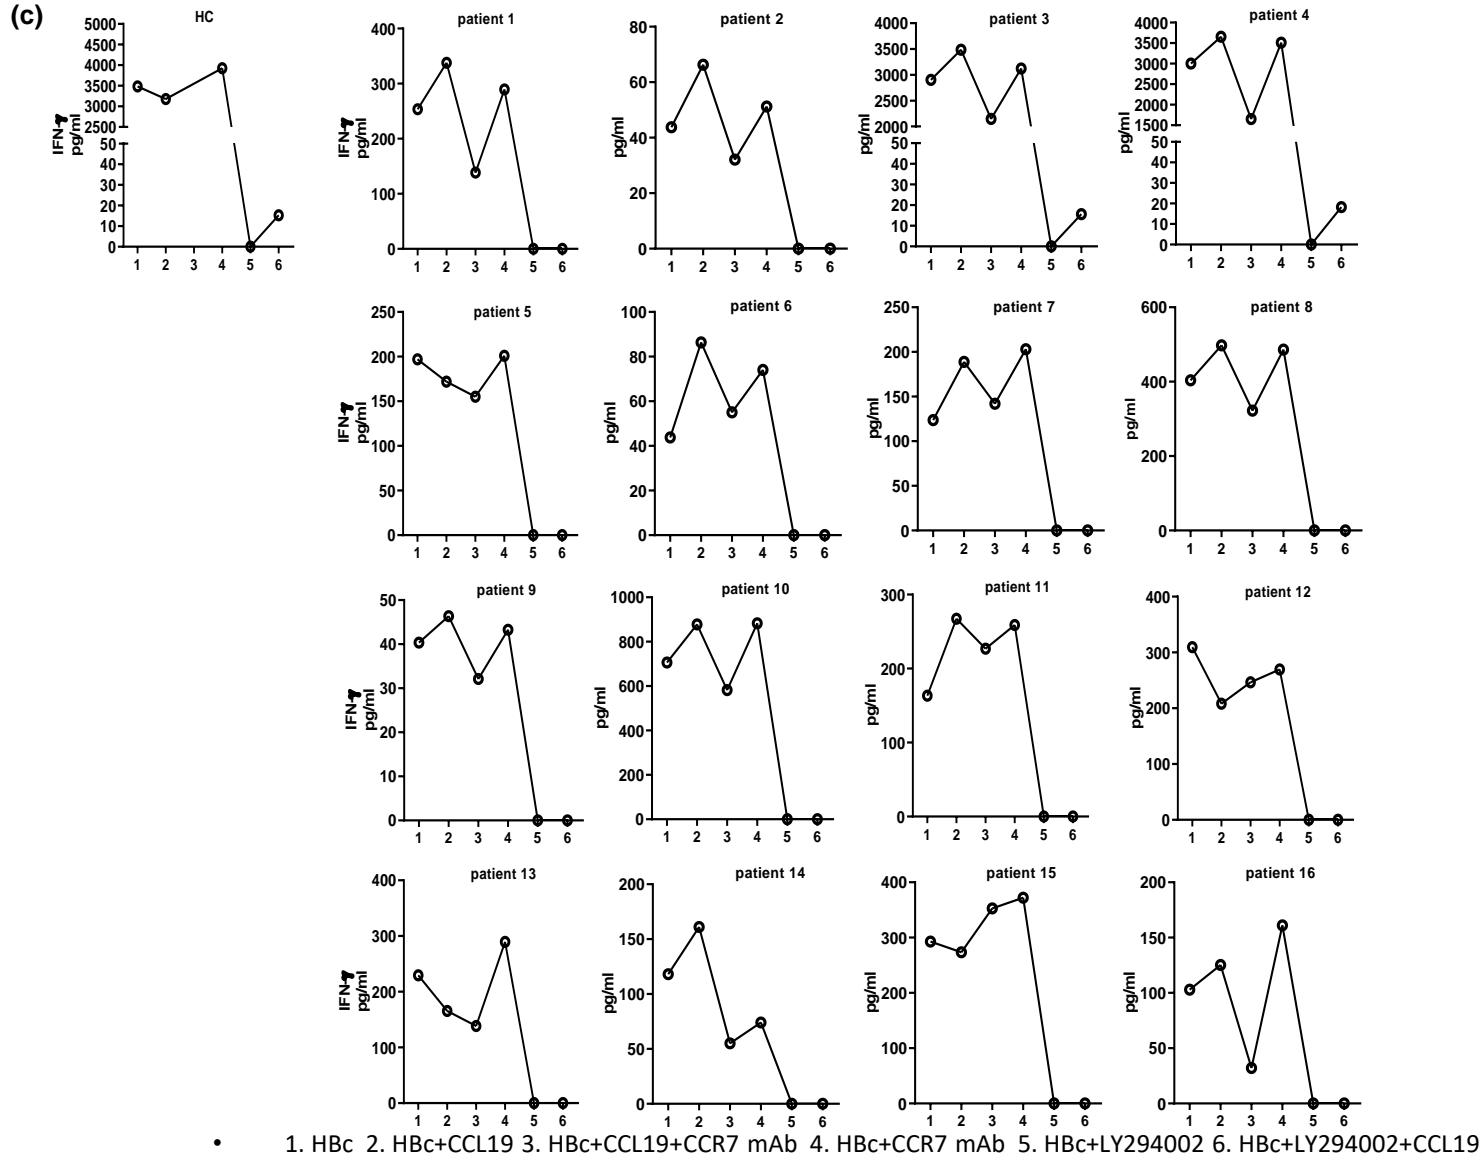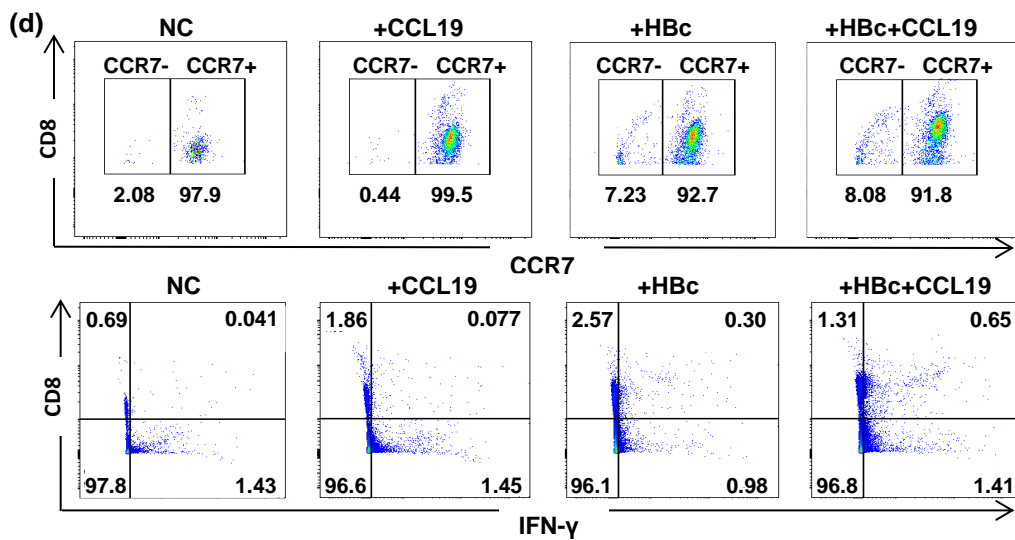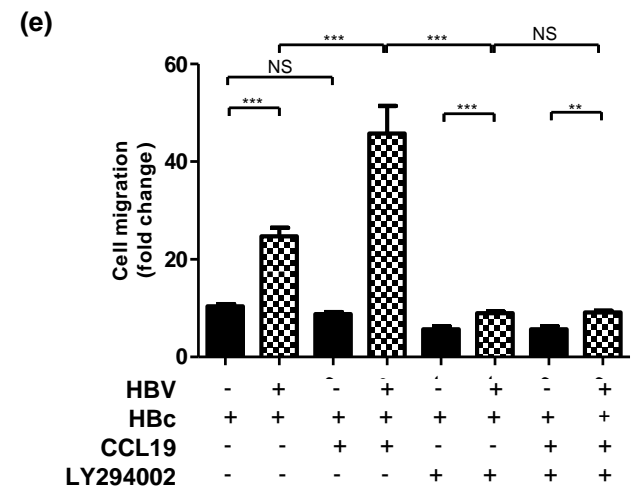

(a)

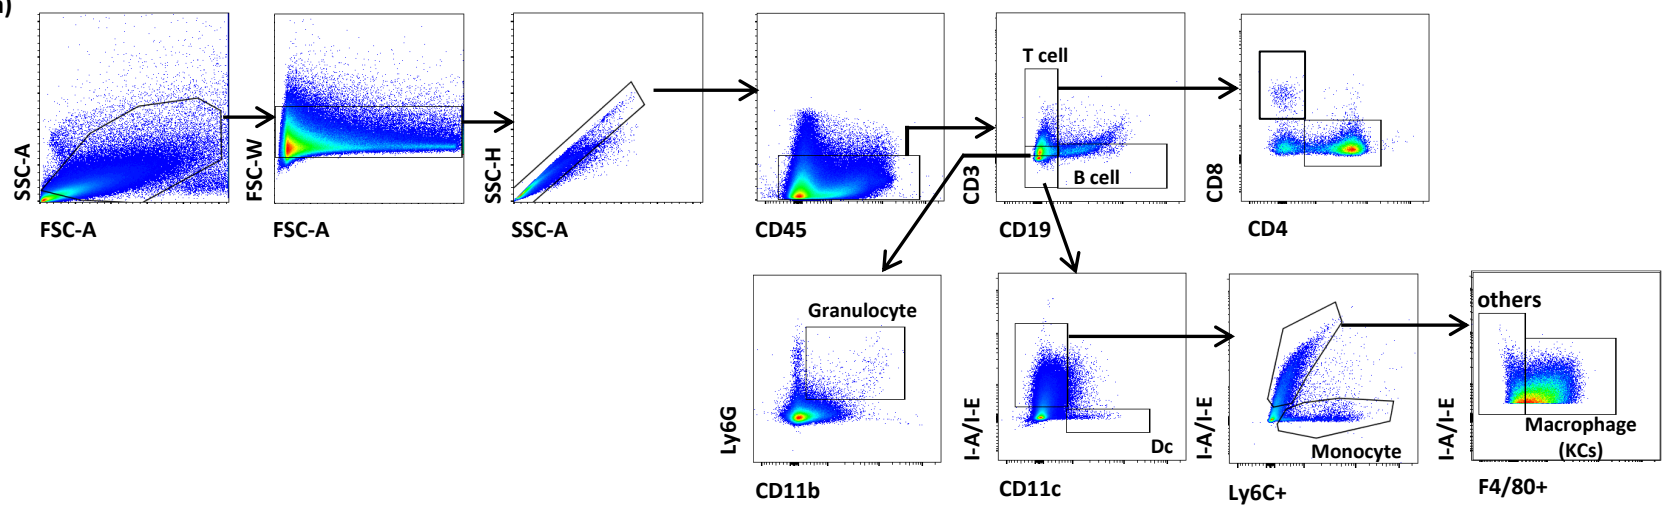

(b)

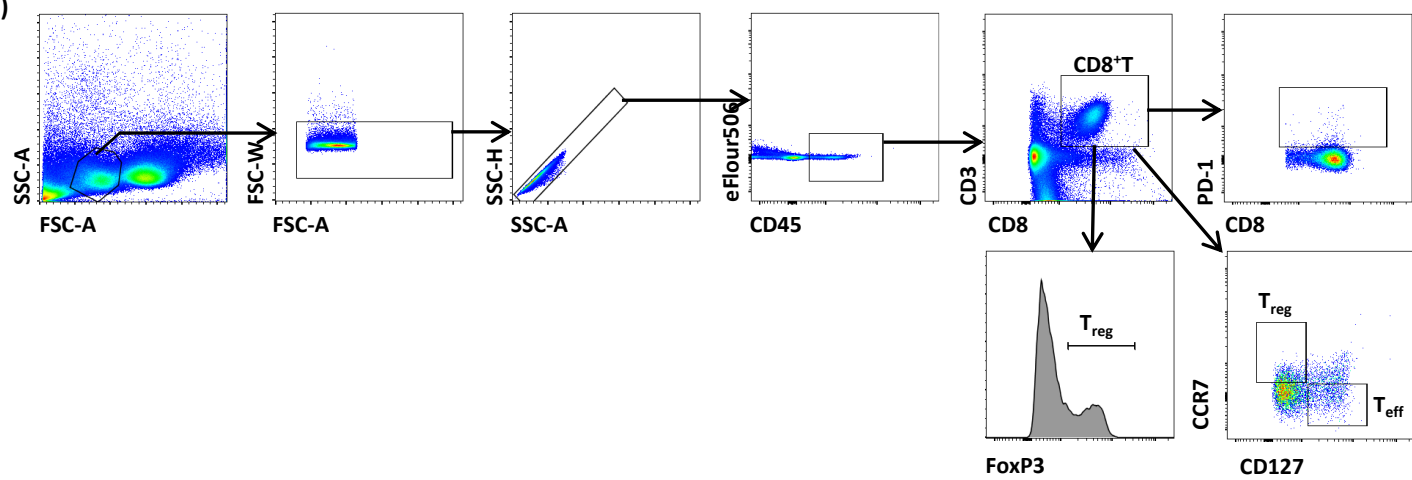

(c)

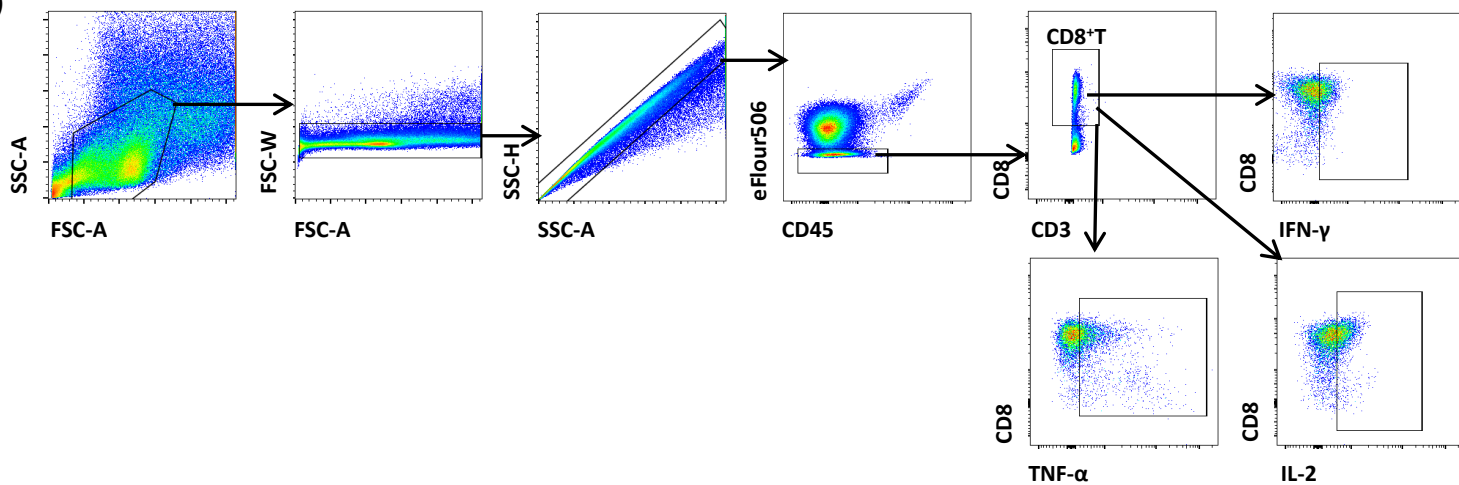

Supplement: 535_2021_1799_MOESM1_ESM.pdf [file 535_2021_1799_MOESM1_ESM.pdf]
